# Supplementary material for: Soil C, N, and P distribution as affected by plant communities in the Yellow River Delta, China
Source: PLoS One. 2019 Dec 20;14(12):e0226887. doi: 10.1371/journal.pone.0226887 (PMC6924685; doi:10.1371/journal.pone.0226887)
Supplement: S2 File — (XLS) [file pone.0226887.s002.xls]

## Sheet: Table 1
Table 1 Correlation coefficients of soil properties (n=24)
Repeats	pH	Soil EC	SOC (g kg-1)	Soil TN (g kg-1)	Soil C:N	Soil AP (mg kg-1)	soil AK (mg kg-1)
1	8.12	124.928	6.37878	0.726392	10.2826	4.77974	99.2753
2	8.215	113.756	4.55581	0.529446	10.1154	3.37405	46.758
3	8.21	108.966	4.00682	0.409331	11.5276	3.2201	39.2558
4	8.4075	117.906	2.40519	0.28831	9.59259	2.52189	34.2543
5	8.495	118.697	1.33587	0.224246	7.05848	1.90931	36.755
6	8.6325	127.197	1.2481	0.247639	6.0982	1.77393	46.3947
7	7.3125	3714.09	9.92004	0.957487	12.1128	7.62726	197.319
8	7.585	2201.28	6.2299	0.61299	11.8142	4.58789	153.658
9	7.56	2701.56	3.05222	0.326285	10.8796	3.21424	112.538
10	7.47	2493.09	2.15934	0.238495	10.6622	2.18687	71.3001
11	7.805	2277.66	2.3766	0.270216	10.3076	2.606	60.2371
12	7.6875	2110.55	2.86463	0.323689	10.3836	4.05561	44.0073
13	7.8375	141.191	9.78851	1.15806	10.047	4.03296	126.839
14	7.86	118.013	4.73067	0.427582	13.1189	2.8877	99.4431
15	7.9525	100.194	3.28425	0.304131	12.7581	2.73592	68.3114
16	7.9925	110.591	1.82915	0.201733	10.6787	2.54838	52.1229
17	8.0225	113.931	1.88362	0.196055	11.7322	2.16619	60.0926
18	8.1325	105.591	2.17745	0.240707	10.9623	2.00898	62.0188
19	7.985	773.875	5.53732	0.608374	10.7182	7.28633	78.7717
20	8.265	603.883	4.71522	0.53884	10.3483	5.65917	43.9042
21	8.1825	905.75	2.22043	0.279068	9.07432	2.81633	33.942
22	8.18	1139.31	1.64218	0.18798	10.3363	2.12335	31.4515
23	8.205	1207.66	2.35025	0.275007	10.0844	2.87642	36.2622
24	8.2	1503.88	2.89216	0.35218	9.735	4.19208	92.4507

## Sheet: Table 2
	Table 2 Results of two-way ANOVA for the effect of plant community, soil depths and season dynamics on SOC and TN distribution (n=216)
	plant communities	soil depths	seasons	SOC concentrations			plant communities	soil depths	seasons	Soil TN concentrations		soil depths
	AG	A	Spring	6.64			AG	A	Spring	0.61		A:0-10cm
	AG	A	Spring	6.98			AG	A	Spring	0.76		B:10-20cm
	AG	A	Spring	6.53			AG	A	Spring	0.74		C:20-30cm
	AG	A	Spring	6.17			AG	A	Spring	0.78		D:30-40cm
	AG	B	Spring	5.25			AG	B	Spring	0.4		E:40-50cm
	AG	B	Spring	4.97			AG	B	Spring	0.64		F:50-60cm
	AG	B	Spring	4.94			AG	B	Spring	0.63
	AG	B	Spring	4.91			AG	B	Spring	0.66
	AG	C	Spring	3.9			AG	C	Spring	0.24
	AG	C	Spring	3.55			AG	C	Spring	0.48
	AG	C	Spring	3.85			AG	C	Spring	0.34
	AG	C	Spring	3.75			AG	C	Spring	0.5
	AG	D	Spring	1.25			AG	D	Spring	0.1
	AG	D	Spring	1.27			AG	D	Spring	0.24
	AG	D	Spring	0.85			AG	D	Spring	0.21
	AG	D	Spring	2.33			AG	D	Spring	0.34
	AG	E	Spring	0.79			AG	E	Spring	0.23
	AG	E	Spring	1.13			AG	E	Spring	0.21
	AG	E	Spring	0.95			AG	E	Spring	0.22
	AG	E	Spring	0.72			AG	E	Spring	0.21
	AG	F	Spring	1.13			AG	F	Spring	0.43
	AG	F	Spring	1.76			AG	F	Spring	0.31
	AG	F	Spring	1.45			AG	F	Spring	0.27
	AG	F	Spring	1.18			AG	F	Spring	0.22
	CT	A	Spring	7.04			CT	A	Spring	0.7
	CT	A	Spring	9.44			CT	A	Spring	0.92
	CT	A	Spring	10.97			CT	A	Spring	1.08
	CT	A	Spring	6.03			CT	A	Spring	0.52
	CT	B	Spring	2.75			CT	B	Spring	0.32
	CT	B	Spring	4.62			CT	B	Spring	0.53
	CT	B	Spring	3.06			CT	B	Spring	0.34
	CT	B	Spring	4.29			CT	B	Spring	0.33
	CT	C	Spring	2.12			CT	C	Spring	0.27
	CT	C	Spring	2.21			CT	C	Spring	0.26
	CT	C	Spring	2.68			CT	C	Spring	0.27
	CT	C	Spring	2.4			CT	C	Spring	0.27
	CT	D	Spring	2.64			CT	D	Spring	0.33
	CT	D	Spring	2.08			CT	D	Spring	0.25
	CT	D	Spring	2.09			CT	D	Spring	0.24
	CT	D	Spring	2.18			CT	D	Spring	0.1
	CT	E	Spring	4.09			CT	E	Spring	0.51
	CT	E	Spring	2.36			CT	E	Spring	0.29
	CT	E	Spring	2.23			CT	E	Spring	0.23
	CT	E	Spring	2.6			CT	E	Spring	0.17
	CT	F	Spring	2.22			CT	F	Spring	0.27
	CT	F	Spring	3.96			CT	F	Spring	0.46
	CT	F	Spring	3.99			CT	F	Spring	0.42
	CT	F	Spring	3.29			CT	F	Spring	0.25
	LF	A	Spring	5.86			LF	A	Spring	0.95
	LF	A	Spring	8.65			LF	A	Spring	0.94
	LF	A	Spring	9.55			LF	A	Spring	1.14
	LF	A	Spring	8.48			LF	A	Spring	1.06
	LF	B	Spring	7.57			LF	B	Spring	0.55
	LF	B	Spring	3.83			LF	B	Spring	0.3
	LF	B	Spring	3.05			LF	B	Spring	0.25
	LF	B	Spring	6.18			LF	B	Spring	0.41
	LF	C	Spring	5.14			LF	C	Spring	0.36
	LF	C	Spring	3.28			LF	C	Spring	0.23
	LF	C	Spring	2.82			LF	C	Spring	0.24
	LF	C	Spring	2.23			LF	C	Spring	0.18
	LF	D	Spring	2.21			LF	D	Spring	0.17
	LF	D	Spring	1.57			LF	D	Spring	0.12
	LF	D	Spring	1.96			LF	D	Spring	0.16
	LF	D	Spring	1.74			LF	D	Spring	0.14
	LF	E	Spring	1.32			LF	E	Spring	0.12
	LF	E	Spring	1.13			LF	E	Spring	0.08
	LF	E	Spring	2.84			LF	E	Spring	0.2
	LF	E	Spring	1.81			LF	E	Spring	0.17
	LF	F	Spring	1.81			LF	F	Spring	0.15
	LF	F	Spring	1.09			LF	F	Spring	0.18
	LF	F	Spring	2.66			LF	F	Spring	0.2
	LF	F	Spring	3.45			LF	F	Spring	0.33
	CF	A	Spring	4.91			CF	A	Spring	0.54
	CF	A	Spring	4.82			CF	A	Spring	0.54
	CF	A	Spring	5.01			CF	A	Spring	0.61
	CF	A	Spring	5.42			CF	A	Spring	0.64
	CF	B	Spring	4.19			CF	B	Spring	0.48
	CF	B	Spring	4.47			CF	B	Spring	0.5
	CF	B	Spring	4.17			CF	B	Spring	0.66
	CF	B	Spring	5.92			CF	B	Spring	0.64
	CF	C	Spring	1.73			CF	C	Spring	0.26
	CF	C	Spring	1.5			CF	C	Spring	0.22
	CF	C	Spring	1.37			CF	C	Spring	0.21
	CF	C	Spring	1.33			CF	C	Spring	0.21
	CF	D	Spring	1.43			CF	D	Spring	0.2
	CF	D	Spring	1.6			CF	D	Spring	0.23
	CF	D	Spring	1.56			CF	D	Spring	0.2
	CF	D	Spring	1.1			CF	D	Spring	0.17
	CF	E	Spring	2.29			CF	E	Spring	0.3
	CF	E	Spring	3.12			CF	E	Spring	0.41
	CF	E	Spring	2.04			CF	E	Spring	0.29
	CF	E	Spring	1.41			CF	E	Spring	0.18
	CF	F	Spring	2.13			CF	F	Spring	0.29
	CF	F	Spring	1.64			CF	F	Spring	0.22
	CF	F	Spring	2.46			CF	F	Spring	0.42
	CF	F	Spring	2.53			CF	F	Spring	0.35
	AG	A	Summer	5.26			AG	A	Summer	0.7
	AG	A	Summer	6.73			AG	A	Summer	0.86
	AG	A	Summer	5.97			AG	A	Summer	0.74
	AG	A	Summer	6.5			AG	A	Summer	0.79
	AG	B	Summer	3.79			AG	B	Summer	0.5
	AG	B	Summer	4.78			AG	B	Summer	0.55
	AG	B	Summer	3.99			AG	B	Summer	0.55
	AG	B	Summer	4.25			AG	B	Summer	0.59
	AG	C	Summer	4.94			AG	C	Summer	0.33
	AG	C	Summer	4.32			AG	C	Summer	0.53
	AG	C	Summer	3.58			AG	C	Summer	0.49
	AG	C	Summer	3.66			AG	C	Summer	0.52
	AG	D	Summer	2.73			AG	D	Summer	0.24
	AG	D	Summer	2.6			AG	D	Summer	0.38
	AG	D	Summer	2.87			AG	D	Summer	0.35
	AG	D	Summer	3.15			AG	D	Summer	0.44
	AG	E	Summer	1.92			AG	E	Summer	0.27
	AG	E	Summer	1.47			AG	E	Summer	0.26
	AG	E	Summer	1.35			AG	E	Summer	0.25
	AG	E	Summer	2.54			AG	E	Summer	0.38
	AG	F	Summer	0.98			AG	F	Summer	0.27
	AG	F	Summer	1.31			AG	F	Summer	0.24
	AG	F	Summer	1.11			AG	F	Summer	0.23
	AG	F	Summer	1.09			AG	F	Summer	0.25
	CT	A	Summer	10.65			CT	A	Summer	1.04
	CT	A	Summer	10.35			CT	A	Summer	1.07
	CT	A	Summer	10.11			CT	A	Summer	0.93
	CT	A	Summer	8.88			CT	A	Summer	0.77
	CT	B	Summer	8.45			CT	B	Summer	0.83
	CT	B	Summer	8.03			CT	B	Summer	0.82
	CT	B	Summer	6.66			CT	B	Summer	0.66
	CT	B	Summer	7.53			CT	B	Summer	0.59
	CT	C	Summer	3.69			CT	C	Summer	0.4
	CT	C	Summer	3.61			CT	C	Summer	0.37
	CT	C	Summer	3.5			CT	C	Summer	0.4
	CT	C	Summer	2.87			CT	C	Summer	0.3
	CT	D	Summer	2.12			CT	D	Summer	0.27
	CT	D	Summer	1.81			CT	D	Summer	0.26
	CT	D	Summer	2.2			CT	D	Summer	0.26
	CT	D	Summer	2.32			CT	D	Summer	0.24
	CT	E	Summer	1.58			CT	E	Summer	0.2
	CT	E	Summer	2.15			CT	E	Summer	0.25
	CT	E	Summer	3.04			CT	E	Summer	0.35
	CT	E	Summer	2.5			CT	E	Summer	0.29
	CT	F	Summer	1.72			CT	F	Summer	0.21
	CT	F	Summer	2.39			CT	F	Summer	0.32
	CT	F	Summer	4.36			CT	F	Summer	0.55
	CT	F	Summer	3.65			CT	F	Summer	0.43
	LF	A	Summer	7.88			LF	A	Summer	1.19
	LF	A	Summer	14.56			LF	A	Summer	1.79
	LF	A	Summer	13.11			LF	A	Summer	1.42
	LF	A	Summer	11.41			LF	A	Summer	1.61
	LF	B	Summer	4.15			LF	B	Summer	0.39
	LF	B	Summer	6.77			LF	B	Summer	0.56
	LF	B	Summer	4.25			LF	B	Summer	0.37
	LF	B	Summer	6.11			LF	B	Summer	0.5
	LF	C	Summer	3.89			LF	C	Summer	0.34
	LF	C	Summer	6.08			LF	C	Summer	0.48
	LF	C	Summer	2.79			LF	C	Summer	0.28
	LF	C	Summer	3.77			LF	C	Summer	0.34
	LF	D	Summer	3.84			LF	D	Summer	0.39
	LF	D	Summer	2.57			LF	D	Summer	0.29
	LF	D	Summer	1.65			LF	D	Summer	0.19
	LF	D	Summer	2.59			LF	D	Summer	0.26
	LF	E	Summer	3.12			LF	E	Summer	0.29
	LF	E	Summer	1.67			LF	E	Summer	0.21
	LF	E	Summer	1.68			LF	E	Summer	0.17
	LF	E	Summer	1.83			LF	E	Summer	0.2
	LF	F	Summer	2.67			LF	F	Summer	0.25
	LF	F	Summer	2.02			LF	F	Summer	0.19
	LF	F	Summer	1.97			LF	F	Summer	0.18
	LF	F	Summer	0.98			LF	F	Summer	0.14
	CF	A	Summer	6.44			CF	A	Summer	0.69
	CF	A	Summer	6.22			CF	A	Summer	0.76
	CF	A	Summer	6.41			CF	A	Summer	0.71
	CF	A	Summer	6.36			CF	A	Summer	0.72
	CF	B	Summer	4.78			CF	B	Summer	0.53
	CF	B	Summer	4.44			CF	B	Summer	0.62
	CF	B	Summer	4.29			CF	B	Summer	0.45
	CF	B	Summer	4.5			CF	B	Summer	0.53
	CF	C	Summer	2.9			CF	C	Summer	0.34
	CF	C	Summer	2.11			CF	C	Summer	0.29
	CF	C	Summer	1.3			CF	C	Summer	0.21
	CF	C	Summer	2.1			CF	C	Summer	0.28
	CF	D	Summer	1.97			CF	D	Summer	0.21
	CF	D	Summer	1.67			CF	D	Summer	0.2
	CF	D	Summer	1.41			CF	D	Summer	0.16
	CF	D	Summer	1.68			CF	D	Summer	0.19
	CF	E	Summer	2.59			CF	E	Summer	0.3
	CF	E	Summer	2.08			CF	E	Summer	0.23
	CF	E	Summer	2.09			CF	E	Summer	0.28
	CF	E	Summer	2.25			CF	E	Summer	0.27
	CF	F	Summer	3.03			CF	F	Summer	0.52
	CF	F	Summer	3.42			CF	F	Summer	0.43
	CF	F	Summer	3.12			CF	F	Summer	0.27
	CF	F	Summer	3.19			CF	F	Summer	0.41
	AG	A	Autumn	6.6			AG	A	Autumn	0.52
	AG	A	Autumn	5.5			AG	A	Autumn	0.75
	AG	A	Autumn	7.24			AG	A	Autumn	0.74
	AG	A	Autumn	6.45			AG	A	Autumn	0.73
	AG	B	Autumn	4.59			AG	B	Autumn	0.35
	AG	B	Autumn	4.49			AG	B	Autumn	0.54
	AG	B	Autumn	4.25			AG	B	Autumn	0.49
	AG	B	Autumn	4.45			AG	B	Autumn	0.45
	AG	C	Autumn	5.39			AG	C	Autumn	0.25
	AG	C	Autumn	3.01			AG	C	Autumn	0.43
	AG	C	Autumn	3.97			AG	C	Autumn	0.4
	AG	C	Autumn	4.12			AG	C	Autumn	0.42
	AG	D	Autumn	3.06			AG	D	Autumn	0.14
	AG	D	Autumn	2.69			AG	D	Autumn	0.4
	AG	D	Autumn	3.11			AG	D	Autumn	0.31
	AG	D	Autumn	2.95			AG	D	Autumn	0.32
	AG	E	Autumn	1.13			AG	E	Autumn	0.14
	AG	E	Autumn	1.05			AG	E	Autumn	0.17
	AG	E	Autumn	1.57			AG	E	Autumn	0.19
	AG	E	Autumn	1.25			AG	E	Autumn	0.17
	AG	F	Autumn	1.38			AG	F	Autumn	0.19
	AG	F	Autumn	1.06			AG	F	Autumn	0.2
	AG	F	Autumn	1.3			AG	F	Autumn	0.19
	AG	F	Autumn	1.25			AG	F	Autumn	0.17
	CT	A	Autumn	10.45			CT	A	Autumn	1.06
	CT	A	Autumn	11.44			CT	A	Autumn	1.11
	CT	A	Autumn	12.29			CT	A	Autumn	1.14
	CT	A	Autumn	11.39			CT	A	Autumn	1.1
	CT	B	Autumn	7.11			CT	B	Autumn	0.73
	CT	B	Autumn	8.32			CT	B	Autumn	0.76
	CT	B	Autumn	6.6			CT	B	Autumn	0.71
	CT	B	Autumn	7.34			CT	B	Autumn	0.73
	CT	C	Autumn	3.3			CT	C	Autumn	0.32
	CT	C	Autumn	3.66			CT	C	Autumn	0.34
	CT	C	Autumn	3.19			CT	C	Autumn	0.37
	CT	C	Autumn	3.38			CT	C	Autumn	0.34
	CT	D	Autumn	2.08			CT	D	Autumn	0.27
	CT	D	Autumn	2.05			CT	D	Autumn	0.22
	CT	D	Autumn	2.23			CT	D	Autumn	0.23
	CT	D	Autumn	2.12			CT	D	Autumn	0.24
	CT	E	Autumn	2.03			CT	E	Autumn	0.27
	CT	E	Autumn	1.94			CT	E	Autumn	0.21
	CT	E	Autumn	2.03			CT	E	Autumn	0.23
	CT	E	Autumn	2			CT	E	Autumn	0.24
	CT	F	Autumn	2.22			CT	F	Autumn	0.25
	CT	F	Autumn	2.3			CT	F	Autumn	0.24
	CT	F	Autumn	2.07			CT	F	Autumn	0.24
	CT	F	Autumn	2.2			CT	F	Autumn	0.24
	LF	A	Autumn	10.21			LF	A	Autumn	1.03
	LF	A	Autumn	9.01			LF	A	Autumn	0.88
	LF	A	Autumn	9.26			LF	A	Autumn	0.93
	LF	A	Autumn	9.49			LF	A	Autumn	0.95
	LF	B	Autumn	3.59			LF	B	Autumn	0.42
	LF	B	Autumn	2.94			LF	B	Autumn	0.39
	LF	B	Autumn	4.61			LF	B	Autumn	0.53
	LF	B	Autumn	3.71			LF	B	Autumn	0.45
	LF	C	Autumn	3.09			LF	C	Autumn	0.35
	LF	C	Autumn	1.85			LF	C	Autumn	0.26
	LF	C	Autumn	2.11			LF	C	Autumn	0.29
	LF	C	Autumn	2.35			LF	C	Autumn	0.3
	LF	D	Autumn	1.17			LF	D	Autumn	0.22
	LF	D	Autumn	0.87			LF	D	Autumn	0.16
	LF	D	Autumn	0.83			LF	D	Autumn	0.14
	LF	D	Autumn	0.95			LF	D	Autumn	0.17
	LF	E	Autumn	1.23			LF	E	Autumn	0.19
	LF	E	Autumn	1.28			LF	E	Autumn	0.2
	LF	E	Autumn	2.29			LF	E	Autumn	0.3
	LF	E	Autumn	1.6			LF	E	Autumn	0.23
	LF	F	Autumn	2.94			LF	F	Autumn	0.39
	LF	F	Autumn	2.3			LF	F	Autumn	0.34
	LF	F	Autumn	1.87			LF	F	Autumn	0.24
	LF	F	Autumn	2.37			LF	F	Autumn	0.32
	CF	A	Autumn	5.11			CF	A	Autumn	0.48
	CF	A	Autumn	5.34			CF	A	Autumn	0.55
	CF	A	Autumn	5.19			CF	A	Autumn	0.53
	CF	A	Autumn	5.22			CF	A	Autumn	0.52
	CF	B	Autumn	5.5			CF	B	Autumn	0.51
	CF	B	Autumn	4.53			CF	B	Autumn	0.57
	CF	B	Autumn	4.84			CF	B	Autumn	0.46
	CF	B	Autumn	4.96			CF	B	Autumn	0.51
	CF	C	Autumn	3.77			CF	C	Autumn	0.32
	CF	C	Autumn	3.76			CF	C	Autumn	0.53
	CF	C	Autumn	1.69			CF	C	Autumn	0.17
	CF	C	Autumn	3.08			CF	C	Autumn	0.34
	CF	D	Autumn	1.44			CF	D	Autumn	0.12
	CF	D	Autumn	2.39			CF	D	Autumn	0.25
	CF	D	Autumn	1.64			CF	D	Autumn	0.14
	CF	D	Autumn	1.82			CF	D	Autumn	0.17
	CF	E	Autumn	1.53			CF	E	Autumn	0.12
	CF	E	Autumn	3.73			CF	E	Autumn	0.41
	CF	E	Autumn	2.49			CF	E	Autumn	0.24
	CF	E	Autumn	2.58			CF	E	Autumn	0.26
	CF	F	Autumn	3.81			CF	F	Autumn	0.39
	CF	F	Autumn	2.3			CF	F	Autumn	0.23
	CF	F	Autumn	3.78			CF	F	Autumn	0.38
	CF	F	Autumn	3.3			CF	F	Autumn	0.33
